# Supplementary material for: A theoretical electronic structure with a feasibility study of laser cooling of LaNa molecules with a spin orbit effect
Source: Royal Society of Chemistry journal article supplement (doi:10.1039/d1cp05210a), 2022-01-01
Supplement: d1cp05210a1.pdf [file d1cp05210a1.pdf]

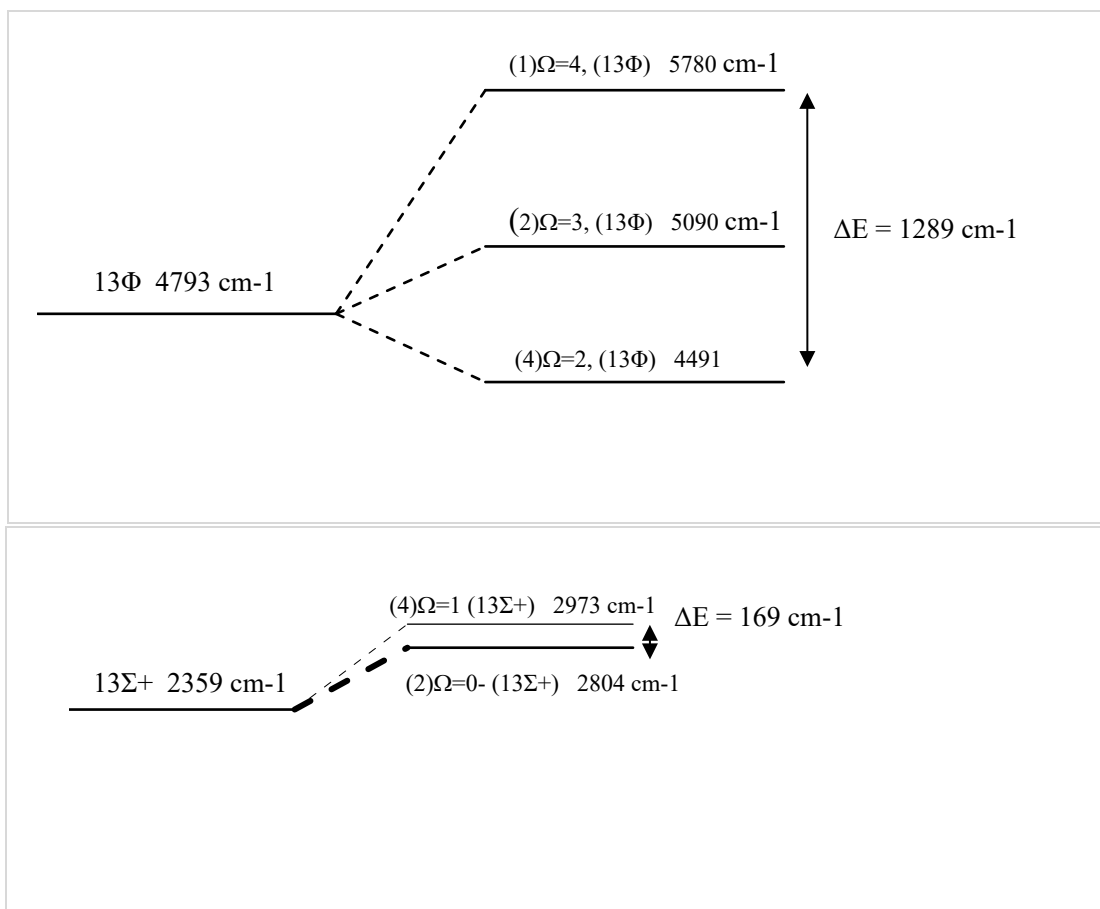

Figure FS1: The spin-orbit splitting  $\Delta E$  for the  $1^3\Sigma^+$  and  $1^3\Phi$  parent states and their corresponding daughter states.

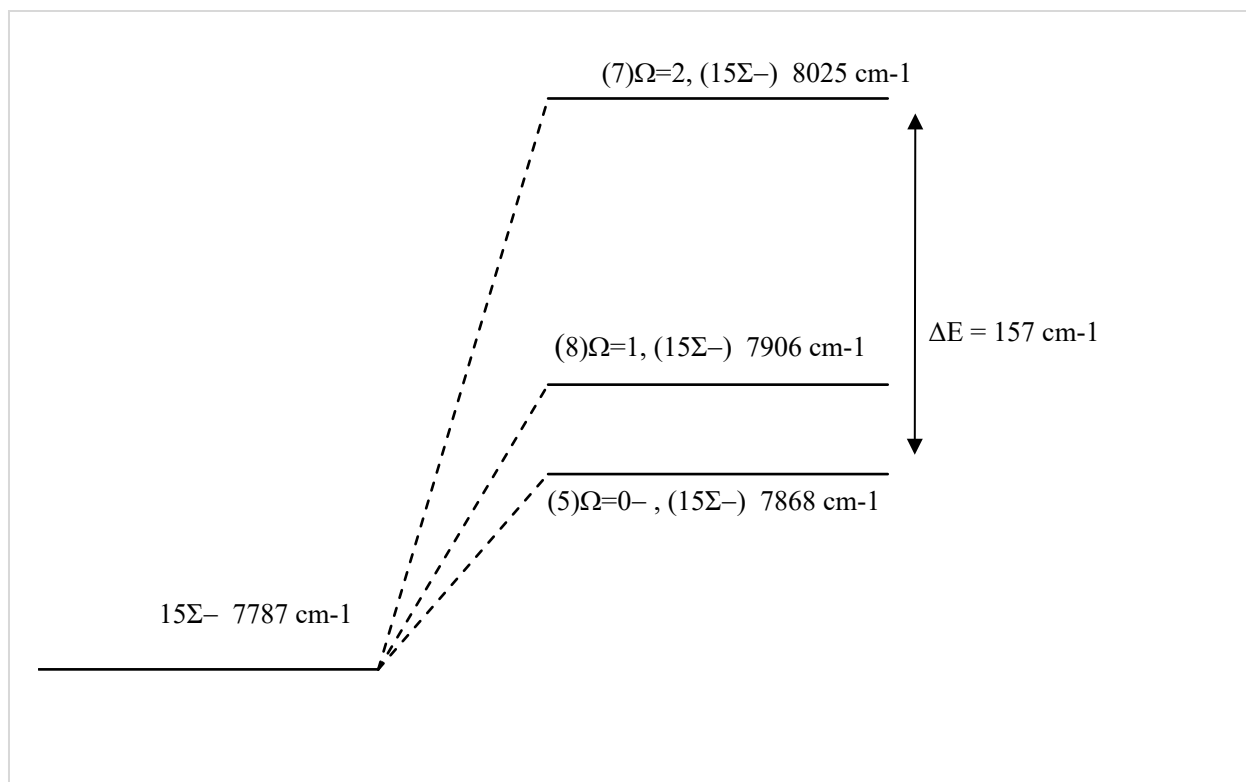

Figure FS2: The spin-orbit splitting  $\Delta E$  for the  $1^5\Sigma^-$  parent states and its corresponding daughter state.

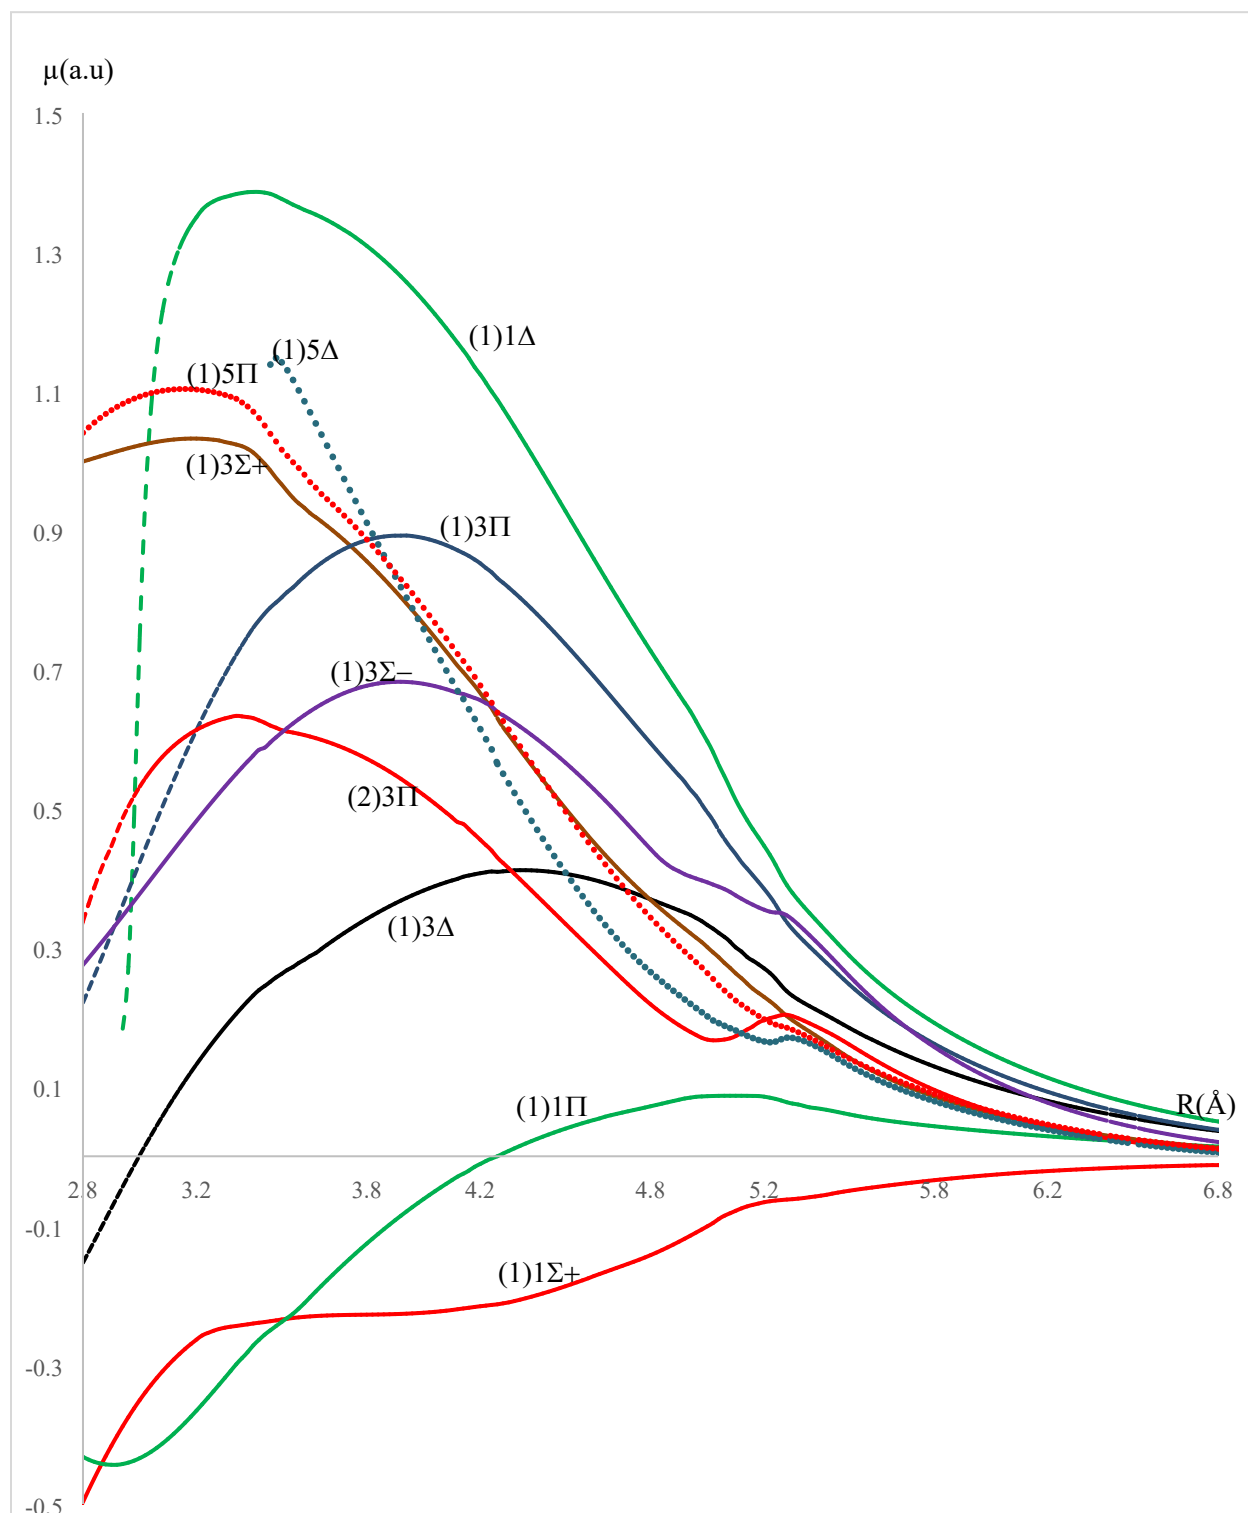

Figure FS3: Permanent dipole moment curves for singlet, triplet and quintet electronic states of LaNa molecule using spin-free MRCI + Q calculation.

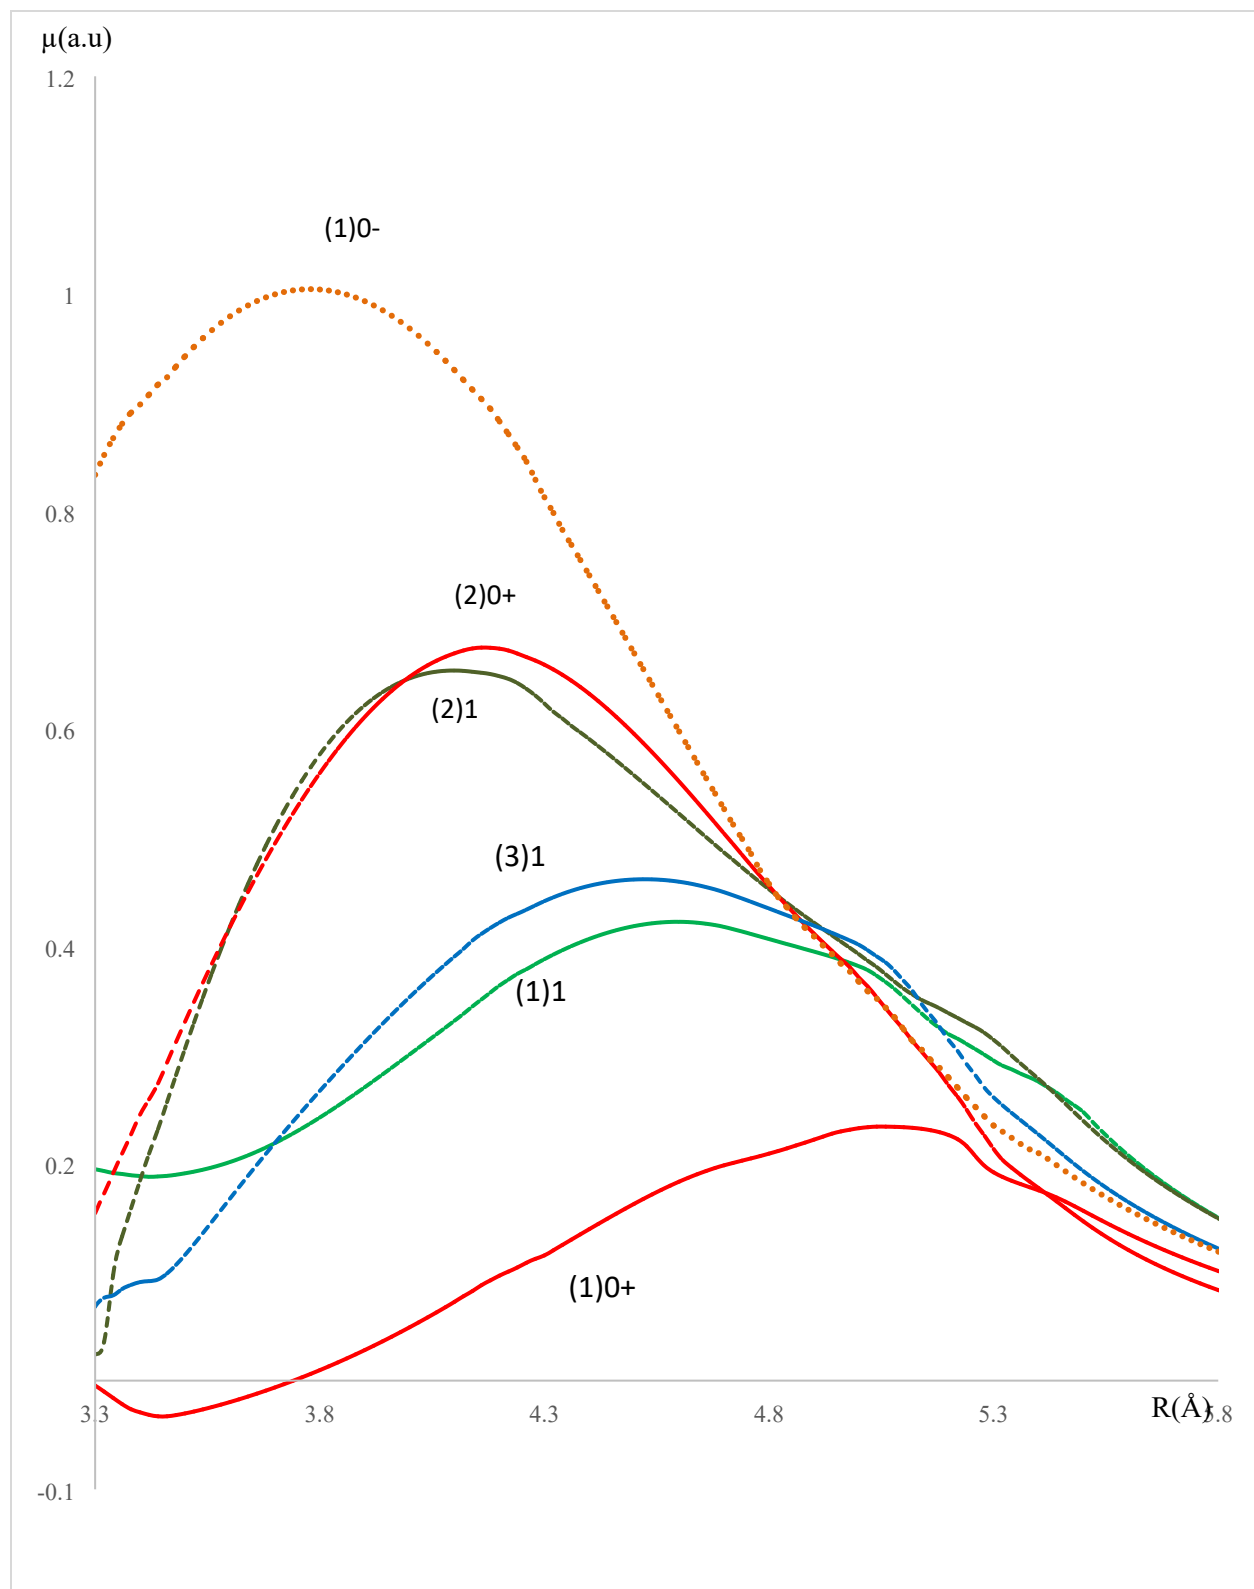

Figure FS4: Permanent dipole moment curves of the electronic states  $\Omega = 0^+, 0^-, 1$  of LaNa molecule.

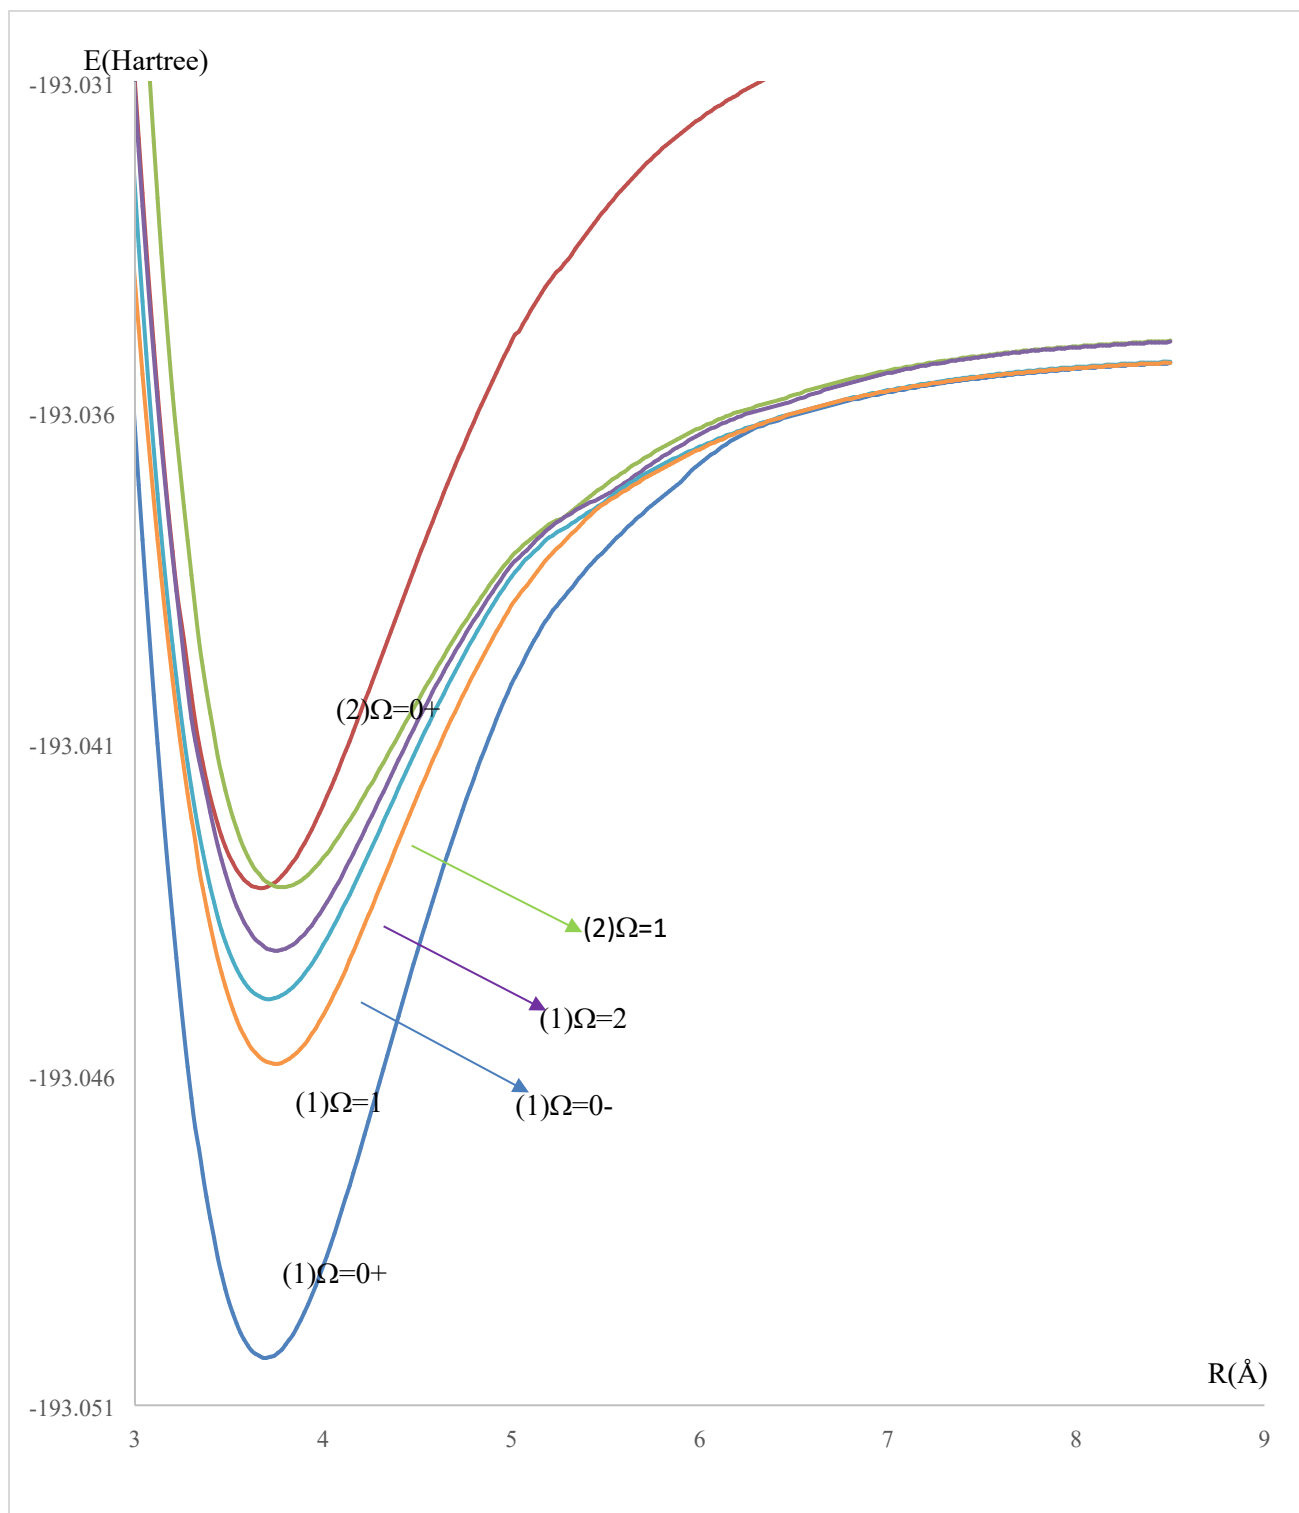

Fig. FS5: potential energy curves of the  $\Omega$  states  $(1)0^+$ ,  $(1)1$ ,  $(1)2$ ,  $(1)0^-$ ,  $(2)1$ ,  $(2)0^+$ .

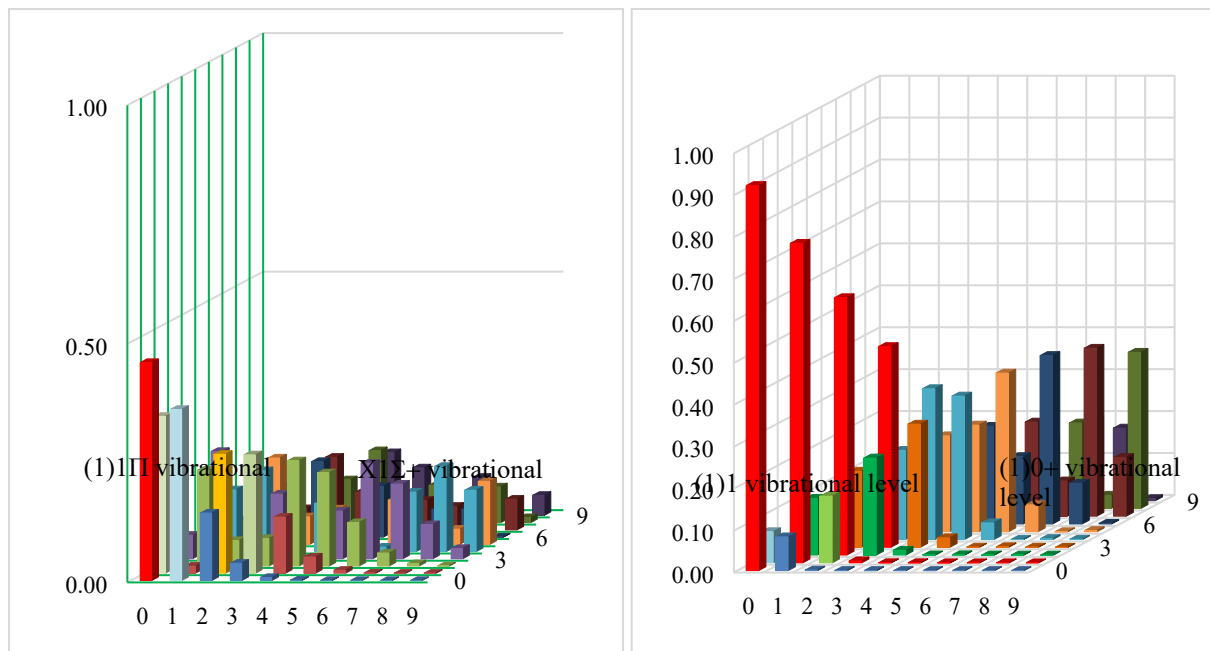

Fig. FS6: The FCF plotting of the considered transitions LaNa  $X^1\Sigma^+ - (1)^1\Pi$  and  $(1)0^+ - (1)1$  of LaNa molecule.

Table TS1: Positions of the avoided crossings  $R_{AC}$  of  $\Omega$  states of LaNa molecule.

| $\Omega$ | $(n+1) \Omega / n\Omega$ | $R_{AC}$ (Å) |
|----------|--------------------------|--------------|
| $0^+$    | 4/2                      | 2.76         |
|          | 5/4                      | 2.80         |
|          |                          | 4.80         |
|          | 5/3                      | 4.96         |
| 1        | 3/2                      | 2.72         |
|          | 5/4                      | 2.76         |
|          |                          | 3.22         |
|          |                          | 3.42         |
|          | 7/5                      | 2.82         |
|          | 7/6                      | 5.66         |
|          | 8/6                      | 2.88         |
|          | 8/7                      | 4.94         |
| 2        | 4/3                      | 3.08         |
|          |                          | 3.22         |
|          | 5/3                      | 2.82         |
|          | 6/4                      | 2.90         |
|          | 6/5                      | 2.88         |
|          |                          | 4.70         |
|          | 7/6                      | 5.00         |
|          | 6/5                      | 5.66         |
| 3        | 2/1                      | 2.80         |
|          | 3/2                      | 2.90         |
|          |                          | 5.60         |

Table TS2: The radiative lifetimes  $\tau$  and vibrational branching ratio of the spin orbit vibrational Transitions of the molecule LaNa:

| LaNa _ spin orbit transition (1) $\Omega=1 \rightarrow$ (2) $\Omega=0^+$ |         |                       |             |             |             |             |             |             |
|--------------------------------------------------------------------------|---------|-----------------------|-------------|-------------|-------------|-------------|-------------|-------------|
|                                                                          |         | $v'((2)\Omega=0^+)=0$ | 1           | 2           | 3           | 4           | 5           | 6           |
| $v((1)\Omega=1)=0$                                                       | Av $v'$ | 464.4728036           | 118.0982974 | 5.73743034  | 0.000949279 | 0.004402833 | 2.5096E-05  | 2.95825E-06 |
|                                                                          | Rv $v'$ | 0.88220504            | 0.22571986  | 0.01110528  | 0.00000187  | 0.00000895  | 0.00000006  | 0.00000001  |
| $v=1$                                                                    | Av $v'$ | 57.74968714           | 305.2267057 | 192.4783961 | 13.92589029 | 6.1581E-05  | 0.021134957 | 9.0847E-05  |
|                                                                          | Rv $v'$ | 0.10968794            | 0.58337615  | 0.37255815  | 0.02745865  | 0.00000013  | 0.00004764  | 0.00000027  |
| $v=2$                                                                    | Av $v'$ | 4.100764067           | 89.28948863 | 196.8944367 | 236.9272309 | 22.30575356 | 0.006917491 | 0.064420502 |
|                                                                          | Rv $v'$ | 0.00778886            | 0.17065793  | 0.38110577  | 0.46716601  | 0.04534783  | 0.00001559  | 0.00019465  |
| $v=3$                                                                    | Av $v'$ | 0.16564654            | 10.02315561 | 103.9830484 | 124.210911  | 260.8337352 | 29.12700876 | 0.070412219 |
|                                                                          | Rv $v'$ | 0.00031462            | 0.01915714  | 0.20126795  | 0.24491535  | 0.53027770  | 0.06565237  | 0.00021275  |
| $v=4$                                                                    | Av $v'$ | 0.001373222           | 0.561676381 | 16.3356809  | 107.787844  | 76.38222935 | 270.9716667 | 33.77570996 |
|                                                                          | Rv $v'$ | 0.00000261            | 0.00107353  | 0.03161909  | 0.21253284  | 0.15528587  | 0.61077103  | 0.10205250  |
| $v=5$                                                                    | Av $v'$ | 0.000303561           | 0.00663598  | 1.191106438 | 22.24593139 | 104.7056944 | 45.01959597 | 272.7386862 |
|                                                                          | Rv $v'$ | 0.00000058            | 0.00001268  | 0.00230549  | 0.04386386  | 0.21286777  | 0.10147432  | 0.82407345  |
| $v=6$                                                                    | Av $v'$ | 0.000181489           | 0.001421326 | 0.019775379 | 2.05978389  | 27.64951916 | 98.50872688 | 24.31472551 |
|                                                                          | Rv $v'$ | 0.00000034            | 0.00000272  | 0.00003828  | 0.00406142  | 0.05621176  | 0.22203899  | 0.07346636  |
| Sum( $s^{-1}$ ) = $A_{v'v}$                                              |         | 526.4907596           | 523.207381  | 516.6398742 | 507.1585407 | 491.8813961 | 443.6550759 | 330.9640482 |
| $\tau:(s) = 1/A_{v'v}$                                                   |         | 0.001899369           | 0.001911288 | 0.001935584 | 0.00197177  | 0.00203301  | 0.002254003 | 0.003021476 |
| LaNa _ spin orbit transition (1) $\Omega=2 \rightarrow$ (2) $\Omega=0^+$ |         |                       |             |             |             |             |             |             |
|                                                                          |         | $v'((2)\Omega=0^+)=0$ | 1           | 2           | 3           | 4           | 5           | 6           |
| $v((1)\Omega=2)=0$                                                       | Av $v'$ | 711.6676537           | 169.0936721 | 7.065103303 | 0.000262996 | 0.005699466 | 7.01134E-07 | 3.08787E-06 |
|                                                                          | Rv $v'$ | 0.83006417            | 0.21250722  | 0.00960745  | 0.00000039  | 0.00000944  | 0.00000000  | 0.00000001  |
| $v=1$                                                                    | Av $v'$ | 133.8450155           | 392.9475154 | 256.588478  | 16.94731597 | 0.004296194 | 0.027068581 | 0.000108473 |
|                                                                          | Rv $v'$ | 0.15611213            | 0.49383388  | 0.34892062  | 0.02503748  | 0.00000712  | 0.00006271  | 0.00000042  |
| $v=2$                                                                    | Av $v'$ | 11.42133696           | 201.7680194 | 191.4588327 | 288.3545279 | 26.93243232 | 0.027800967 | 0.082393599 |
|                                                                          | Rv $v'$ | 0.01332145            | 0.25357047  | 0.26035438  | 0.42600673  | 0.04460578  | 0.00006441  | 0.00032014  |
| $v=3$                                                                    | Av $v'$ | 0.424880082           | 30.03701751 | 223.2527773 | 74.2413107  | 282.4601013 | 35.17756357 | 0.11393255  |
|                                                                          | Rv $v'$ | 0.00049557            | 0.03774880  | 0.30358922  | 0.10968199  | 0.46781345  | 0.08149930  | 0.00044268  |
| $v=4$                                                                    | Av $v'$ | 8.94124E-05           | 1.836743882 | 52.10615241 | 213.1380823 | 16.77150577 | 251.9570139 | 40.89899661 |
|                                                                          | Rv $v'$ | 0.00000010            | 0.00230831  | 0.07085630  | 0.31488411  | 0.02777715  | 0.58373348  | 0.15891078  |
| $v=5$                                                                    | Av $v'$ | 0.004172899           | 0.008873234 | 4.833325622 | 74.32605736 | 183.4310321 | 0.066893112 | 208.2669985 |
|                                                                          | Rv $v'$ | 0.00000487            | 0.00001115  | 0.00657257  | 0.10980719  | 0.30380044  | 0.00015498  | 0.80920987  |



|                             |       |             |             |             |             |             |             |             |
|-----------------------------|-------|-------------|-------------|-------------|-------------|-------------|-------------|-------------|
| $v = 6$                     | Av v' | 0.001470776 | 0.016041932 | 0.073135682 | 9.870310966 | 94.18283397 | 144.373887  | 8.00837435  |
|                             | Rv v' | 0.00000172  | 0.00002016  | 0.00009945  | 0.01458212  | 0.15598662  | 0.33448512  | 0.03111609  |
| Sum( $s^{-1}$ ) = $A_{v,v}$ |       | 857.3646193 | 795.7078835 | 735.3778051 | 676.8778682 | 603.7879011 | 431.6302278 | 257.3708072 |
| $\tau:(s) = 1/A_{v,v}$      |       | 0.001166365 | 0.001256743 | 0.001359845 | 0.001477371 | 0.001656211 | 0.002316798 | 0.003885445 |

LaNa \_ spin orbit transition (1) $\Omega=0 \rightarrow$  (2) $\Omega=1$

|                             |       | $v'((2)\Omega=1) = 0$ | 1           | 2          | 3           | 4           | 5           | 6           |
|-----------------------------|-------|-----------------------|-------------|------------|-------------|-------------|-------------|-------------|
| $v((1)\Omega=0) = 0$        | Av v' | 2.375276154           | 0.781117331 | 0.189755   | 0.044409856 | 0.010457442 | 0.002512119 | 0.000618588 |
|                             | Rv v' | 0.96039894            | 0.30306163  | 0.07102404 | 0.01621829  | 0.00373401  | 0.00088492  | 0.00023898  |
| $v = 1$                     | Av v' | 0.097398916           | 1.61284771  | 1.230303   | 0.474880297 | 0.153142054 | 0.045982283 | 0.013602742 |
|                             | Rv v' | 0.03938145            | 0.62576034  | 0.46049427 | 0.17342430  | 0.05468205  | 0.01619768  | 0.00525509  |
| $v = 2$                     | Av v' | 0.000532904           | 0.181657587 | 1.001016   | 1.386694178 | 0.766758001 | 0.321328191 | 0.118943149 |
|                             | Rv v' | 0.00021547            | 0.07048038  | 0.37467366 | 0.50641492  | 0.27378436  | 0.11319079  | 0.04595083  |
| $v = 3$                     | Av v' | 1.01E-05              | 0.001759468 | 0.246785   | 0.538341678 | 1.326058634 | 0.996649542 | 0.515319961 |
|                             | Rv v' | 0.00000410            | 0.00068265  | 0.09236999 | 0.19660013  | 0.47349243  | 0.35107890  | 0.19908149  |
| $v = 4$                     | Av v' | 9.47E-08              | 3.82E-05    | 0.003752   | 0.287230417 | 0.232271005 | 1.107180662 | 1.116777951 |
|                             | Rv v' | 0.00000004            | 0.00001481  | 0.00140435 | 0.10489535  | 0.08293643  | 0.39001449  | 0.43144033  |
| $v = 5$                     | Av v' | 9.25E-11              | 4.91E-07    | 9.01E-05   | 0.006518865 | 0.301860042 | 0.065826946 | 0.820065232 |
|                             | Rv v' | 0.00000000            | 0.00000019  | 0.00003372 | 0.00238066  | 0.10778441  | 0.02318814  | 0.31681250  |
| $v = 6$                     | Av v' | 7.84E-12              | 1.10E-09    | 1.24E-06   | 0.000181641 | 0.010043789 | 0.299339539 | 0.003159977 |
|                             | Rv v' | 0.00000000            | 0.00000000  | 0.00000046 | 0.00006633  | 0.00358631  | 0.10544508  | 0.00122078  |
| Sum( $s^{-1}$ ) = $A_{v,v}$ |       | 2.473218217           | 2.57742077  | 2.671701   | 2.738256934 | 2.800590967 | 2.838819282 | 2.588487599 |
| $\tau:(s) = 1/A_{v,v}$      |       | 0.404331487           | 0.387984768 | 0.374293   | 0.365195825 | 0.357067495 | 0.352259126 | 0.386325977 |

LaNa \_ spin orbit transition (1) $\Omega=1 \rightarrow$  (2) $\Omega=1$

|                             |       | $v'((2)\Omega=1)=0$ | 1           | 2           | 3           | 4           | 5           | 6           |
|-----------------------------|-------|---------------------|-------------|-------------|-------------|-------------|-------------|-------------|
| $v(1)\Omega=1)=0$           | Av v' | 0.000501103         | 1.86717E-05 | 6.40436E-08 | 3.42175E-07 | 1.41852E-07 | 7.20429E-10 | 4.68134E-08 |
|                             | Rv v' | 0.72493305          | 0.01392082  | 0.00002627  | 0.00008117  | 0.00002370  | 0.00000014  | 0.00004598  |
| $v = 1$                     | Av v' | 0.000161962         | 0.000734954 | 2.43243E-05 | 7.72584E-07 | 2.01735E-07 | 3.25454E-07 | 2.51649E-07 |
|                             | Rv v' | 0.23430657          | 0.54795118  | 0.00997716  | 0.00018326  | 0.00003371  | 0.00006445  | 0.00024718  |
| $v = 2$                     | Av v' | 2.59536E-05         | 0.000454497 | 0.000993891 | 2.23175E-05 | 2.08368E-06 | 5.23986E-07 | 4.47995E-09 |
|                             | Rv v' | 0.03754638          | 0.33885419  | 0.40766614  | 0.00529386  | 0.00034817  | 0.00010376  | 0.00000440  |
| $v = 3$                     | Av v' | 2.03075E-06         | 0.000114347 | 0.000973598 | 0.0012884   | 9.4765E-06  | 1.0936E-05  | 2.93426E-06 |
|                             | Rv v' | 0.00293784          | 0.08525242  | 0.39934231  | 0.30561645  | 0.00158348  | 0.00216552  | 0.00288213  |
| $v = 4$                     | Av v' | 1.49673E-07         | 1.65139E-05 | 0.000363735 | 0.001816568 | 0.001456297 | 3.16861E-06 | 3.78145E-05 |
|                             | Rv v' | 0.00021653          | 0.01231205  | 0.14919365  | 0.43090130  | 0.24334078  | 0.00062744  | 0.03714272  |
| $v = 5$                     | Av v' | 3.87183E-08         | 2.09167E-06 | 7.4026E-05  | 0.000887415 | 0.002844737 | 0.001311257 | 8.39832E-05 |
|                             | Rv v' | 0.00005601          | 0.00155946  | 0.03036339  | 0.21050039  | 0.47534292  | 0.25965159  | 0.08249119  |
| $v = 6$                     | Av v' | 2.50314E-09         | 2.01044E-07 | 8.36497E-06 | 0.000199926 | 0.001671661 | 0.003723852 | 0.000893052 |
|                             | Rv v' | 0.00000362          | 0.00014989  | 0.00343107  | 0.04742358  | 0.27932723  | 0.73738711  | 0.87718640  |
| Sum( $s^{-1}$ ) = $A_{v,v}$ |       | 0.00069124          | 0.001341276 | 0.002438003 | 0.00421574  | 0.005984599 | 0.005050064 | 0.001018087 |

| $\tau:(s) = 1/A_{v'v}$                                                                            |       | 1446.6758          | 745.5584357 | 410.1717007 | 237.2062613 | 167.0955868 | 198.0172906 | 982.2347464 |
|---------------------------------------------------------------------------------------------------|-------|--------------------|-------------|-------------|-------------|-------------|-------------|-------------|
| <b>LaNa _ spin orbit transition (1)<math>\Omega=2 \rightarrow</math> (2)<math>\Omega=1</math></b> |       |                    |             |             |             |             |             |             |
|                                                                                                   |       | $v((2)\Omega=1)=0$ | 1           | 2           | 3           | 4           | 5           | 6           |
| $v((1)\Omega=2)=0$                                                                                | Av v' | 125.5427814        | 7.54785346  | 0.051166867 | 0.00732867  | 0.001800919 | 2.9353E-05  | 2.18865E-05 |
|                                                                                                   | Rv v' | 0.98604202         | 0.06681109  | 0.00051217  | 0.00008270  | 0.00002271  | 0.00000041  | 0.00000040  |
| v = 1                                                                                             | Av v' | 1.721800856        | 101.7020502 | 16.00483102 | 0.37411557  | 0.008035339 | 0.007270752 | 0.000546636 |
|                                                                                                   | Rv v' | 0.01352342         | 0.90023280  | 0.16020461  | 0.00422188  | 0.00010132  | 0.00010190  | 0.00000988  |
| v = 2                                                                                             | Av v' | 0.054915932        | 3.574036428 | 78.23537515 | 24.4451134  | 1.306054687 | 8.07613E-05 | 0.011328581 |
|                                                                                                   | Rv v' | 0.00043132         | 0.03163618  | 0.78311779  | 0.27586190  | 0.01646921  | 0.00000113  | 0.00020470  |
| v = 3                                                                                             | Av v' | 0.000391417        | 0.148633024 | 5.338364122 | 56.5466222  | 31.55646188 | 3.21268159  | 0.027280339 |
|                                                                                                   | Rv v' | 0.00000307         | 0.00131565  | 0.05343578  | 0.63812585  | 0.39792359  | 0.04502690  | 0.00049294  |
| v = 4                                                                                             | Av v' | 6.58094E-06        | 0.000412186 | 0.272667057 | 6.82149296  | 37.8815313  | 35.65638805 | 6.379526728 |
|                                                                                                   | Rv v' | 0.00000005         | 0.00000365  | 0.00272933  | 0.07698021  | 0.47768204  | 0.49973721  | 0.11527528  |
| v = 5                                                                                             | Av v' | 1.18238E-05        | 2.94618E-05 | 2.32146E-05 | 0.41867253  | 7.982794274 | 23.58327578 | 36.02367923 |
|                                                                                                   | Rv v' | 0.00000009         | 0.00000026  | 0.00000023  | 0.00472470  | 0.10066218  | 0.33052816  | 0.65093226  |
| v = 6                                                                                             | Av v' | 2.33354E-06        | 4.13972E-05 | 8.77161E-06 | 0.00024413  | 0.566139158 | 8.890550558 | 12.89928795 |
|                                                                                                   | Rv v' | 0.00000002         | 0.00000037  | 0.00000009  | 0.00000275  | 0.00713895  | 0.12460429  | 0.23308454  |
| Sum( $s^{-1}$ ) = $A_{v'v}$                                                                       |       | 127.3199103        | 112.9730561 | 99.9024362  | 88.6135894  | 79.30281756 | 71.35027684 | 55.34167135 |
| $\tau:(s) = 1/A_{v'v}$                                                                            |       | 0.007854231        | 0.008851668 | 0.010009766 | 0.01128495  | 0.012609892 | 0.014015363 | 0.018069566 |

Table TS3: Variation of the laser slowing distance (L) in function of the number of the lasers needed (Laser  $N^\circ$ ), the number of cycles (N) for photon absorption/emission and the total decay channels involved ( $\eta$ ) for cooling LaNa molecular beam for the transitions (1) $\Omega=0^+$  - (2) $\Omega=1$  and (1) $\Omega=0^+$  - (2) $\Omega=1b$ .

| <b>Transition (1)<math>\Omega=0^+</math> - (2)<math>\Omega=1</math></b>   |                  |          |                                                                |          |
|---------------------------------------------------------------------------|------------------|----------|----------------------------------------------------------------|----------|
|                                                                           | Lasers $N^\circ$ | N        | Total decay channels involved ( $\eta$ )                       | L        |
| a                                                                         | 4                | 687.66   | $(R_{00}+R_{01})+(R_{02}+R_{03})(R_{10}+R_{11}+R_{12}+R_{13})$ | 8.75 cm  |
| b                                                                         | 4                | 1617.24  | $(R_{00}+R_{01}+R_{02})+(R_{03})(R_{10}+R_{11}+R_{12}+R_{13})$ | 48.40 cm |
| c                                                                         | 4                | 1956.72  | $R_{00}+R_{01}+R_{02}+R_{03}$                                  | 70.80 cm |
| d                                                                         | 3                | 191.16   | $R_{00}+R_{01}+R_{02}$                                         | 0.68 cm  |
| e                                                                         | 3                | 164.82   | $(R_{00}+R_{01})+(R_{02})(R_{10}+R_{11}+R_{12}+R_{14})$        | 0.50 cm  |
| f                                                                         | 4                | 37.20    | $(R_{00}+R_{02})+(R_{01}+R_{04})(R_{10}+R_{11}+R_{12}+R_{14})$ | 0.03 cm  |
| <b>Transition (1)<math>\Omega=0^+</math> - (2)<math>\Omega=0^+</math></b> |                  |          |                                                                |          |
| a                                                                         | 4                | 142005.4 | $(R_{00}+R_{01})+(R_{02}+R_{03})(R_{10}+R_{11}+R_{12}+R_{13})$ | 4320 m   |
| b                                                                         | 4                | 142712.4 | $(R_{00}+R_{01}+R_{02})+(R_{03})(R_{10}+R_{11}+R_{12}+R_{13})$ | 4740 m   |
| c                                                                         | 3                | 627.9    | $(R_{01})(R_{10}+R_{11}+R_{12})$                               | 8.46 cm  |

|   |   |         |                                                                |         |
|---|---|---------|----------------------------------------------------------------|---------|
| d | 3 | 13504.5 | $R_{00}+R_{01}+R_{02}$                                         | 39.10 m |
| e | 4 | 4587.6  | $(R_{02}+R_{03})+(R_{00}+R_{01})(R_{20}+R_{21}+R_{22}+R_{23})$ | 4.51 m  |
| f | 2 | 634.7   | $R_{00}+R_{01}$                                                | 8.64 cm |

Table TS4: The vibrational energy  $E_v$ , the rotational constant  $B_v$ , the centrifugal distortion constant  $D_v$ , and the abscissas of the turning points  $R_{\min}$  and  $R_{\max}$  for the vibrational levels of the  $(1)0^+$  and  $(1)1$  states of LaNa molecule.

| (1) $0^+$ |                               |                                           |                                           |                                |                                |
|-----------|-------------------------------|-------------------------------------------|-------------------------------------------|--------------------------------|--------------------------------|
| $v$       | $E_v$<br>( $\text{cm}^{-1}$ ) | $B_v \times 10^2$<br>( $\text{cm}^{-1}$ ) | $D_v \times 10^8$<br>( $\text{cm}^{-1}$ ) | $R_{\min}$<br>( $\text{\AA}$ ) | $R_{\max}$<br>( $\text{\AA}$ ) |
| 0         | 59.66                         | 6.2414                                    | 6.8980                                    | 3.581                          | 3.820                          |
| 1         | 177.94                        | 6.2023                                    | 7.0014                                    | 3.503                          | 3.921                          |
| 2         | 294.73                        | 6.1614                                    | 7.0831                                    | 3.453                          | 3.995                          |
| 3         | 410.06                        | 6.1185                                    | 7.2142                                    | 3.416                          | 4.058                          |
| 4         | 523.83                        | 6.0750                                    | 7.5318                                    | 3.383                          | 4.116                          |
| 5         | 635.74                        | 6.0336                                    | 8.0342                                    | 3.354                          | 4.171                          |
| 6         | 745.51                        | 5.9962                                    | 8.4090                                    | 3.325                          | 4.223                          |
| 7         | 853.19                        | 5.9596                                    | 8.4146                                    | 3.301                          | 4.272                          |
| 8         | 959.02                        | 5.9150                                    | 8.2052                                    | 3.281                          | 4.320                          |
| 9         | 1063.14                       | 5.8610                                    | 7.8603                                    | 3.263                          | 4.368                          |
| 10        | 1165.76                       | 9.0835                                    | 0.3771                                    | 3.245                          | 4.415                          |
| 11        | 1266.83                       | 8.9436                                    | 3.9880                                    | 3.229                          | 4.462                          |
| 12        | 1366.01                       | 9.0685                                    | 2.3300                                    | 3.214                          | 4.509                          |
| (1) 1     |                               |                                           |                                           |                                |                                |
| $v$       | $E_v$<br>( $\text{cm}^{-1}$ ) | $B_v \times 10^2$<br>( $\text{cm}^{-1}$ ) | $D_v \times 10^8$<br>( $\text{cm}^{-1}$ ) | $R_{\min}$<br>( $\text{\AA}$ ) | $R_{\max}$<br>( $\text{\AA}$ ) |
| 0         | 50.72                         | 6.0739                                    | 8.8323                                    | 3.621                          | 3.881                          |
| 1         | 151.02                        | 6.0314                                    | 9.1028                                    | 3.538                          | 3.991                          |
| 2         | 249.60                        | 5.9879                                    | 9.3393                                    | 3.484                          | 4.073                          |
| 3         | 346.52                        | 5.9440                                    | 9.5461                                    | 3.441                          | 4.142                          |
| 4         | 441.85                        | 5.8979                                    | 9.9958                                    | 3.406                          | 4.207                          |
| 5         | 535.26                        | 5.8438                                    | 10.664                                    | 3.375                          | 4.270                          |
| 6         | 626.37                        | 5.7866                                    | 10.575                                    | 3.347                          | 4.329                          |
| 7         | 715.63                        | 5.7338                                    | 10.77                                     | 3.326                          | 4.387                          |
| 8         | 803.07                        | 5.6726                                    | 11.644                                    | 3.303                          | 4.444                          |
| 9         | 888.33                        | 9.0138                                    | 4.0396                                    | 3.282                          | 4.501                          |
| 10        | 971.61                        | 9.0031                                    | 12.227                                    | 3.262                          | 4.558                          |
| 11        | 1052.52                       | 9.1270                                    | 8.8831                                    | 3.244                          | 4.615                          |
| 12        | 1131.19                       | 9.2530                                    | 5.9979                                    | 3.227                          | 4.673                          |

Table TS5: The values of the vibrational energy  $E_v$ , the rotational constants  $B_v$ , the centrifugal distortion constant  $D_v$  and the abscissas of the turning points for the different vibrational levels of the ground state  $X^1\Sigma^+$  of LaNa molecule.

| $X^1\Sigma^+$ |                               |                                           |                                           |                                |                                |
|---------------|-------------------------------|-------------------------------------------|-------------------------------------------|--------------------------------|--------------------------------|
| $v$           | $E_v$<br>( $\text{cm}^{-1}$ ) | $B_v \times 10^2$<br>( $\text{cm}^{-1}$ ) | $D_v \times 10^8$<br>( $\text{cm}^{-1}$ ) | $R_{\min}$<br>( $\text{\AA}$ ) | $R_{\max}$<br>( $\text{\AA}$ ) |
| 0             | 61.21                         | 6.2069                                    | 6.4397                                    | 3.592                          | 3.829                          |
| 1             | 182.58                        | 6.1668                                    | 6.4996                                    | 3.516                          | 3.928                          |
| 2             | 302.56                        | 6.1247                                    | 6.5208                                    | 3.467                          | 4.002                          |
| 3             | 421.21                        | 6.0800                                    | 6.5412                                    | 3.430                          | 4.065                          |
| 4             | 538.48                        | 6.0327                                    | 6.6821                                    | 3.399                          | 4.122                          |
| 5             | 654.14                        | 5.9857                                    | 6.9615                                    | 3.372                          | 4.176                          |
| 6             | 880.06                        | 5.9052                                    | 7.4314                                    | 3.325                          | 4.277                          |
| 7             | 990.31                        | 5.8617                                    | 7.5525                                    | 3.304                          | 4.324                          |
| 8             | 1098.64                       | 5.8116                                    | 7.1697                                    | 3.286                          | 4.371                          |
| 9             | 1205.44                       | 5.7617                                    | 7.2954                                    | 3.269                          | 4.417                          |
| 10            | 1310.64                       | 8.8995                                    | 5.4798                                    | 3.253                          | 4.462                          |
| 11            | 1413.92                       | 9.0230                                    | 2.9575                                    | 3.238                          | 4.508                          |
| 12            | 1515.33                       | 9.1473                                    | 1.4658                                    | 3.224                          | 4.553                          |
| 13            | 1614.74                       | 9.1411                                    | 3.6411                                    | 3.210                          | 4.599                          |
| 14            | 1712.41                       | 9.1301                                    | 8.4827                                    | 3.198                          | 4.644                          |
| 15            | 1808.14                       | 9.2631                                    | 3.7194                                    | 3.186                          | 4.691                          |
| 16            | 1901.96                       | 9.2525                                    | 8.2586                                    | 3.175                          | 4.737                          |
| 17            | 1993.67                       | 9.3888                                    | 3.2678                                    | 3.165                          | 4.784                          |
| 18            | 2083.41                       | 9.3799                                    | 6.8476                                    | 3.155                          | 4.832                          |
| 19            | 2171.22                       | 9.6563                                    | 0.3755                                    | 3.145                          | 4.880                          |
| 20            | 2257.15                       | 9.5115                                    | 4.8394                                    | 3.136                          | 4.928                          |
| 21            | 2341.13                       | 9.6507                                    | 1.5577                                    | 3.128                          | 4.978                          |

Table TS6: The values of the vibrational energies  $E_v$ , the rotational constants  $B_v$ , the centrifugal distortion constant  $D_v$  and the abscissas of the turning points for the different vibrational levels of states  $1^3\Pi$  and  $1^3\Delta$  of LaNa molecule.

| $1^3\Pi$ |                               |                                           |                                           |                                |                                | $1^3\Delta$ |                               |                                           |                                           |                                |                                |
|----------|-------------------------------|-------------------------------------------|-------------------------------------------|--------------------------------|--------------------------------|-------------|-------------------------------|-------------------------------------------|-------------------------------------------|--------------------------------|--------------------------------|
| $v$      | $E_v$<br>( $\text{cm}^{-1}$ ) | $B_v \times 10^2$<br>( $\text{cm}^{-1}$ ) | $D_v \times 10^8$<br>( $\text{cm}^{-1}$ ) | $R_{\min}$<br>( $\text{\AA}$ ) | $R_{\max}$<br>( $\text{\AA}$ ) | $v$         | $E_v$<br>( $\text{cm}^{-1}$ ) | $B_v \times 10^2$<br>( $\text{cm}^{-1}$ ) | $D_v \times 10^8$<br>( $\text{cm}^{-1}$ ) | $R_{\min}$<br>( $\text{\AA}$ ) | $R_{\max}$<br>( $\text{\AA}$ ) |
| 0        | 51.65                         | 6.3049                                    | 9.5191                                    | 3.553                          | 3.810                          | 0           | 51.63                         | 5.9058                                    | 7.8393                                    | 3.675                          | 3.932                          |
| 1        | 153.71                        | 6.2503                                    | 9.7184                                    | 3.472                          | 3.921                          | 1           | 153.55                        | 5.8532                                    | 8.0253                                    | 3.594                          | 4.044                          |
| 2        | 253.98                        | 6.1941                                    | 9.9491                                    | 3.420                          | 4.004                          | 2           | 253.57                        | 5.7992                                    | 8.2162                                    | 3.543                          | 4.128                          |
| 3        | 352.40                        | 6.1364                                    | 10.2140                                   | 3.380                          | 4.077                          | 3           | 351.67                        | 5.7425                                    | 8.5601                                    | 3.503                          | 4.201                          |
| 4        | 448.91                        | 6.0770                                    | 10.4994                                   | 3.347                          | 4.143                          | 4           | 447.50                        | 5.6783                                    | 9.0795                                    | 3.470                          | 4.273                          |
| 5        | 543.46                        | 6.0156                                    | 10.8021                                   | 3.318                          | 4.206                          | 5           | 540.67                        | 5.6117                                    | 8.8997                                    | 3.442                          | 4.336                          |
| 6        | 635.97                        | 5.9506                                    | 11.1666                                   | 3.293                          | 4.268                          | 6           | 631.89                        | 5.5545                                    | 8.6672                                    | 3.420                          | 4.398                          |
| 7        | 726.35                        | 8.8266                                    | 10.2902                                   | 3.271                          | 4.327                          | 7           | 721.54                        | 5.4909                                    | 9.7691                                    | 3.397                          | 4.459                          |
| 8        | 814.72                        | 8.9480                                    | 7.6832                                    | 3.250                          | 4.385                          | 8           | 808.74                        | 8.2881                                    | 3.5867                                    | 3.377                          | 4.520                          |
| 9        | 901.34                        | 9.0721                                    | 5.1857                                    | 3.232                          | 4.443                          | 9           | 893.67                        | 8.3973                                    | 2.3550                                    | 3.359                          | 4.580                          |
| 10       | 985.94                        | 9.1981                                    | 3.2378                                    | 3.215                          | 4.500                          | 10          | 976.32                        | 8.3865                                    | 6.0096                                    | 3.342                          | 4.641                          |
| 11       | 1068.37                       | 9.3259                                    | 1.8101                                    | 3.199                          | 4.558                          | 11          | 1056.33                       | 8.6212                                    | 0.7884                                    | 3.327                          | 4.702                          |
| 12       | 1148.89                       | 9.3183                                    | 4.2766                                    | 3.185                          | 4.616                          | 12          | 1133.99                       | 8.4874                                    | 7.8922                                    | 3.313                          | 4.764                          |
| 13       | 1227.23                       | 9.3045                                    | 9.3157                                    | 3.171                          | 4.674                          | 13          | 1209.05                       | 8.7324                                    | 0.8669                                    | 3.299                          | 4.827                          |
| 14       | 1303.56                       | 9.4425                                    | 4.5324                                    | 3.159                          | 4.733                          | 14          | 1281.92                       | 8.5933                                    | 7.9112                                    | 3.288                          | 4.891                          |
| 15       | 1377.72                       | 9.4283                                    | 9.0224                                    | 3.147                          | 4.793                          | 15          | 1352.42                       | 8.7195                                    | 3.5062                                    | 3.276                          | 4.955                          |
| 16       | 1449.82                       | 9.5715                                    | 3.8673                                    | 3.136                          | 4.854                          | 16          | 1420.26                       | 8.7054                                    | 6.4842                                    | 3.266                          | 5.020                          |
| 17       | 1519.68                       | 9.5586                                    | 7.0372                                    | 3.126                          | 4.915                          | 17          | 1484.73                       | 8.8352                                    | 2.6503                                    | 3.256                          | 5.103                          |
| 18       | 1587.18                       | 9.7050                                    | 2.7379                                    | 3.116                          | 4.979                          | 18          | 1545.54                       | 8.8238                                    | 3.7210                                    | 3.247                          | 5.176                          |
| 19       | 1651.53                       | 9.6945                                    | 4.8794                                    | 3.107                          | 5.063                          | 19          | 1604.11                       | 8.9554                                    | 1.1582                                    | 3.239                          | 5.263                          |
| 20       | 1711.77                       | 9.8426                                    | 1.6339                                    | 3.099                          | 5.136                          | 20          | 1659.65                       | 8.9471                                    | 1.6662                                    | 3.231                          | 5.348                          |

Table TS7: The values of the vibrational energies  $E_v$ , the rotational constants  $B_v$ , the centrifugal distortion constant  $D_v$ , and the abscissas of the turning points for the different vibrational levels of states  $(1)^1\Pi$  and  $1^3\Sigma^+$  of LaNa molecule.

| $1^1\Pi$ |                               |                                           |                                           |                                |                                | $1^3\Sigma^+$ |                               |                                           |                                           |                                |                                |
|----------|-------------------------------|-------------------------------------------|-------------------------------------------|--------------------------------|--------------------------------|---------------|-------------------------------|-------------------------------------------|-------------------------------------------|--------------------------------|--------------------------------|
| $v$      | $E_v$<br>( $\text{cm}^{-1}$ ) | $B_v \times 10^2$<br>( $\text{cm}^{-1}$ ) | $D_v \times 10^7$<br>( $\text{cm}^{-1}$ ) | $R_{\min}$<br>( $\text{\AA}$ ) | $R_{\max}$<br>( $\text{\AA}$ ) | $v$           | $E_v$<br>( $\text{cm}^{-1}$ ) | $B_v \times 10^2$<br>( $\text{cm}^{-1}$ ) | $D_v \times 10^7$<br>( $\text{cm}^{-1}$ ) | $R_{\min}$<br>( $\text{\AA}$ ) | $R_{\max}$<br>( $\text{\AA}$ ) |
| 0        | 41.24                         | 5.6963                                    | 1.1125                                    | 3.727                          | 4.016                          | 0             | 42.51                         | 5.5941                                    | 0.9920                                    | 3.765                          | 4.049                          |
| 1        | 122.03                        | 5.6219                                    | 1.1655                                    | 3.641                          | 4.147                          | 1             | 125.74                        | 5.5201                                    | 1.0434                                    | 3.680                          | 4.178                          |
| 2        | 200.30                        | 5.5429                                    | 1.2299                                    | 3.587                          | 4.249                          | 2             | 206.23                        | 5.4380                                    | 1.1317                                    | 3.627                          | 4.283                          |
| 3        | 275.93                        | 5.4608                                    | 1.2557                                    | 3.546                          | 4.340                          | 3             | 283.46                        | 5.3529                                    | 1.1188                                    | 3.587                          | 4.372                          |
| 4        | 349.33                        | 5.3872                                    | 1.2111                                    | 3.512                          | 4.422                          | 4             | 358.50                        | 5.2808                                    | 1.1483                                    | 3.555                          | 4.456                          |
| 5        | 421.19                        | 5.3120                                    | 1.3419                                    | 3.483                          | 4.502                          | 5             | 431.36                        | 5.1915                                    | 1.2841                                    | 3.527                          | 4.537                          |
| 6        | 490.72                        | 5.2247                                    | 1.3201                                    | 3.458                          | 4.579                          | 6             | 501.35                        | 5.1070                                    | 1.2379                                    | 3.503                          | 4.617                          |
| 7        | 558.30                        | 8.2552                                    | 1.7793                                    | 3.436                          | 4.655                          | 7             | 634.07                        | 7.8733                                    | 1.4184                                    | 3.463                          | 4.777                          |
| 8        | 623.81                        | 8.2383                                    | 5.0863                                    | 3.419                          | 4.731                          | 8             | 696.60                        | 7.9781                                    | 0.9503                                    | 3.445                          | 4.859                          |
| 9        | 687.35                        | 8.3519                                    | 3.5208                                    | 3.401                          | 4.806                          | 9             | 756.30                        | 7.9632                                    | 2.1506                                    | 3.432                          | 4.943                          |
| 10       | 748.76                        | 8.4663                                    | 2.2306                                    | 3.384                          | 4.882                          | 10            | 812.63                        | 8.1903                                    | 0.3318                                    | 3.422                          | 5.047                          |
| 11       | 807.93                        | 8.4513                                    | 5.5064                                    | 3.368                          | 4.959                          | 11            | 864.42                        | 8.0575                                    | 3.1154                                    | 3.411                          | 5.146                          |
| 12       | 863.68                        | 8.5716                                    | 3.5941                                    | 3.355                          | 5.066                          | 12            | 911.23                        | 8.2945                                    | 0.3915                                    | 3.399                          | 5.278                          |
| 13       | 914.69                        | 8.5543                                    | 8.8443                                    | 3.342                          | 5.155                          | 13            | 954.44                        | 8.1620                                    | 3.2518                                    | 3.390                          | 5.390                          |
| 14       | 961.80                        | 8.5271                                    | 17.1513                                   | 3.332                          | 5.274                          | 14            | 995.02                        | 8.2842                                    | 1.2656                                    | 3.381                          | 5.496                          |
| 15       | 1006.13                       | 8.8062                                    | 2.2396                                    | 3.322                          | 5.384                          | 15            | 1034.94                       | 8.3994                                    | 0.5465                                    | 3.373                          | 5.612                          |
| 16       | 1046.20                       | 8.6466                                    | 17.5346                                   | 3.313                          | 5.498                          | 16            | 1071.31                       | 8.2604                                    | 3.8826                                    | 3.366                          | 5.731                          |
| 17       | 1086.03                       | 8.7907                                    | 7.7900                                    | 3.305                          | 5.606                          | 17            | 1106.10                       | 8.2396                                    | 6.6185                                    | 3.359                          | 5.857                          |

Table TS8: The values of the vibrational energies  $E_v$ , the rotational constants  $B_v$ , the centrifugal distortion constant  $D_v$  and the abscissas of the turning points for the different vibrational levels of state  $1^1\Delta$  of LaNa molecule.

| $1^1\Delta$ |                               |                                           |                                           |                                |                                |
|-------------|-------------------------------|-------------------------------------------|-------------------------------------------|--------------------------------|--------------------------------|
| $v$         | $E_v$<br>( $\text{cm}^{-1}$ ) | $B_v \times 10^2$<br>( $\text{cm}^{-1}$ ) | $D_v \times 10^7$<br>( $\text{cm}^{-1}$ ) | $R_{\min}$<br>( $\text{\AA}$ ) | $R_{\max}$<br>( $\text{\AA}$ ) |
| 0           | 38.32                         | 5.3390                                    | 1.0811                                    | 3.849                          | 4.148                          |
| 1           | 112.38                        | 5.2457                                    | 1.1756                                    | 3.762                          | 4.296                          |
| 2           | 183.04                        | 5.1602                                    | 1.1117                                    | 3.709                          | 4.402                          |
| 3           | 252.38                        | 5.0892                                    | 1.2168                                    | 3.668                          | 4.499                          |
| 4           | 383.55                        | 4.9102                                    | 1.3402                                    | 3.607                          | 4.680                          |
| 5           | 445.32                        | 4.8085                                    | 1.3957                                    | 3.583                          | 4.770                          |
| 6           | 504.67                        | 7.5427                                    | 4.9939                                    | 3.561                          | 4.857                          |
| 7           | 561.40                        | 7.6433                                    | 3.6974                                    | 3.542                          | 4.943                          |
| 8           | 615.19                        | 7.7445                                    | 2.6838                                    | 3.526                          | 5.010                          |
| 9           | 664.14                        | 7.7289                                    | 6.6058                                    | 3.511                          | 5.156                          |
| 10          | 709.81                        | 7.8385                                    | 3.4401                                    | 3.499                          | 5.270                          |
| 11          | 754.19                        | 7.8243                                    | 7.5333                                    | 3.487                          | 5.377                          |
