# Supplementary material for: A theoretical electronic structure with a feasibility study of laser cooling of LaNa molecules with a spin orbit effect
Source: Royal Society of Chemistry journal article supplement (doi:10.1039/d1cp05210a), 2022-01-01
Supplement: d1cp05210a2.pdf [file d1cp05210a2.pdf]

### Supplementary Material

- Figure FS1: The spin-orbit splitting  $\Delta E$  for the  $1^3\Sigma^+$  and  $1^3\Phi$  parent states and their corresponding daughter states.
- Figure FS2: The spin-orbit splitting  $\Delta E$  for the  $1^5\Sigma^-$  parent states and its corresponding daughter state.
- Figure FS3: Permanent dipole moment curves for singlet, triplet and quintet electronic states of LaNa molecule using spin-free MRCI + Q calculation.
- Figure FS4: Permanent dipole moment curves of the electronic states  $\Omega = 0^+, 0^-, 1$  of LaNa. Molecule
- Fig. FS5: potential energy curves of the  $\Omega$  states  $(1)0^+, (1)1, (1)2, (1)0^-, (2)1, (2)0^+$ .
- Fig. FS6: The FCF plotting of the considered transitions LaNa  $X^1\Sigma^+ - (1)^1\Pi$  and  $(1)0^+ - (1)1$  of LaNa molecule.
- Table TS1: Positions of the avoided crossings  $R_{AC}$  of  $\Omega$  states of LaNa molecule.
- Table TS2: The radiative lifetimes  $\tau$  and vibrational branching ratio of the spin orbit vibrational Transitions of the molecule LaNa.
- Table TS3: Variation of the laser slowing distance (L) in function of the number of the lasers needed (Laser  $N^\circ$ ), the number of cycles (N) for photon absorption/emission and the total decay channels involved ( $\eta$ ) for cooling LaNa molecular beam for the transitions  $(1)\Omega=0^+ - (2)\Omega=1$  and  $(1)\Omega=0^+ - (2)\Omega=1b$
- Table TS4: The vibrational energy  $E_v$ , the rotational constant  $B_v$ , the centrifugal distortion constant  $D_v$ , and the abscissas of the turning points  $R_{min}$  and  $R_{max}$  for the vibrational levels of the  $(1)0^+$  and  $(1)1$  states of LaNa molecule.
- Table TS5: The values of the vibrational energy  $E_v$ , the rotational constants  $B_v$ , the centrifugal distortion constant  $D_v$  and the abscissas of the turning points for the different vibrational levels of the ground state  $X^1\Sigma^+$  of LaNa molecule.
- Table TS6: The values of the vibrational energies  $E_v$ , the rotational constants  $B_v$ , the centrifugal distortion constant  $D_v$  and the abscissas of the turning points for the different vibrational levels of states  $1^3\Pi$  and  $1^3\Delta$  of LaNa molecule.

- Table TS7: The values of the vibrational energies  $E_v$ , the rotational constants  $B_v$ , the centrifugal distortion constant  $D_v$  and the abscissas of the turning points for the different vibrational levels of states  $(1)^1\Pi$  and  $1^3\Sigma^+$  of LaNa molecule.
- Table TS8: The values of the vibrational energies  $E_v$ , the rotational constants  $B_v$ , the centrifugal distortion constant  $D_v$  and the abscissas of the turning points for the different vibrational levels of state  $1^1\Delta$  of LaNa molecule.
